# Supplementary material for: A Vaccine Based on a Modified Vaccinia Virus Ankara Vector Expressing Zika Virus Structural Proteins Controls Zika Virus Replication in Mice
Source: PubMed Central journal article supplement (PMC6255889; doi:10.1038/s41598-018-35724-6), 2018-11-26
Supplement: 41598_2018_35724_MOESM1_ESM.pdf [file 41598_2018_35724_MOESM1_ESM.pdf]

## **A Vaccine Based on a Modified Vaccinia Virus Ankara Vector Expressing Zika Virus Structural Proteins Controls Zika Virus Replication in Mice**

Patricia Pérez<sup>a</sup>, María Q. Marín<sup>a</sup>, Adrián Lázaro-Frías<sup>a</sup>, Nereida Jiménez de Oya<sup>b</sup>, Ana-Belén Blázquez<sup>b</sup>, Estela Escribano-Romero<sup>b</sup>, Carlos Óscar S. Sorzano<sup>c</sup>, Javier Ortego<sup>d</sup>, Juan-Carlos Sáiz<sup>b</sup>, Mariano Esteban<sup>a#</sup>, Miguel A. Martín-Acebes<sup>b#</sup> and Juan García-Arriaza<sup>a#</sup>

<sup>a</sup> Department of Molecular and Cellular Biology, Centro Nacional de Biotecnología (CNB), Consejo Superior de Investigaciones Científicas (CSIC), Madrid, Spain.

<sup>b</sup> Department of Biotechnology, Instituto Nacional de Investigación y Tecnología Agraria y Alimentaria (INIA), Madrid, Spain.

<sup>c</sup> Biocomputing Unit, Centro Nacional de Biotecnología (CNB), Consejo Superior de Investigaciones Científicas (CSIC), Madrid, Spain.

<sup>d</sup> Centro de Investigación en Sanidad Animal, INIA-CISA, Valdeolmos, Madrid, Spain.

#Address correspondence to Mariano Esteban ([mesteban@cnb.csic.es](mailto:mesteban@cnb.csic.es)), Miguel A. Martín-Acebes ([martin.mangel@inia.es](mailto:martin.mangel@inia.es)) and Juan García-Arriaza ([jfgarcia@cnb.csic.es](mailto:jfgarcia@cnb.csic.es))

|                     | Total amount of splenocytes | CD8 (Total number) | CD8 (Total ZIKV-specific response) | CD107+ IFN $\gamma$ +TNF $\alpha$ +IL-2 | CD107+ IFN $\gamma$ +TNF $\alpha$ | CD107+ IFN $\gamma$ | CD107+ TNF $\alpha$ | CD107           | Total CD107     | Total IFN $\gamma$ | Total IL-2     | Total TNF $\alpha$ |
|---------------------|-----------------------------|--------------------|------------------------------------|-----------------------------------------|-----------------------------------|---------------------|---------------------|-----------------|-----------------|--------------------|----------------|--------------------|
| MVA-ZIKV / MVA-ZIKV | 176,400,000                 | 20,072,141         | 952,005 (4.74%)                    | 54,934 (0.27%)                          | 258,797 (1.29%)                   | 208,058 (1.04%)     | 18,200 (0.09%)      | 412,017 (2.05%) | 952,005 (4.74%) | 521,789 (2.60%)    | 54,934 (0.27%) | 331,931 (1.65%)    |
| MVA-WT / MVA-WT     | 236,400,000                 | 26,819,423         | 0 (0%)                             | 0 (0%)                                  | 0 (0%)                            | 0 (0%)              | 0 (0%)              | 0 (0%)          | 0 (0%)          | 0 (0%)             | 0 (0%)         | 0 (0%)             |

**Table S1. Absolute numbers of ZIKV-specific CD8<sup>+</sup> T cells induced in mice immunized with MVA-ZIKV or MVA-WT.** The values represent the estimated absolute numbers of splenocytes, CD8<sup>+</sup> T cells and ZIKV-specific CD8<sup>+</sup> T cells producing CD107a and/or IFN- $\gamma$  and/or TNF- $\alpha$  and/or IL-2 against the ZIKV E protein peptide pool, obtained from Balb/c mice immunized with MVA-ZIKV or MVA-WT. The percentages are included between brackets, and are also represented in Fig. 5.
